# Supplementary material for: Selection of reference genes for miRNA qRT-PCR under abiotic stress in grapevine
Source: PubMed Central journal article supplement (PMC5849727; doi:10.1038/s41598-018-22743-6), 2018-03-13
Supplement: 41598_2018_22743_MOESM1_ESM.pdf [file 41598_2018_22743_MOESM1_ESM.pdf]

# **Selection of reference genes for miRNA qRT-PCR under abiotic stress in grapevine**

Meng Luo<sup>1,2</sup>, Zhen Gao<sup>1,2</sup>, Hui Li<sup>1,2</sup>, Qin Li<sup>1,2</sup>, Caixi Zhang<sup>1,2</sup>, Wenping Xu<sup>1,2</sup>,  
Shiren Song<sup>1,2</sup>, Chao Ma<sup>1,2\*</sup>, Shiping Wang<sup>1,2,3\*</sup>

<sup>1</sup>Department of Plant Science, School of Agriculture and Biology, Shanghai Jiao Tong University, Shanghai, China

<sup>2</sup>Center for Viticulture and Enology, School of Agriculture and Biology, Shanghai Jiao Tong University, Shanghai 200240, China.

<sup>3</sup>Institute of Agro-food Science and Technology, Key Laboratory of Agro-products Processing Technology of Shandong, Shandong Academy of Agricultural Sciences, Jinan 250100, People's Republic of China

\* **Corresponding author:** Department of Plant Science, School of Agriculture and Biology, Shanghai Jiao Tong University, Shanghai, China.

Tel& Fax: +0086-21-34205961

E-mail address: [chaoma2015@sjtu.edu.cn](mailto:chaoma2015@sjtu.edu.cn), [fruit@sjtu.edu.cn](mailto:fruit@sjtu.edu.cn)

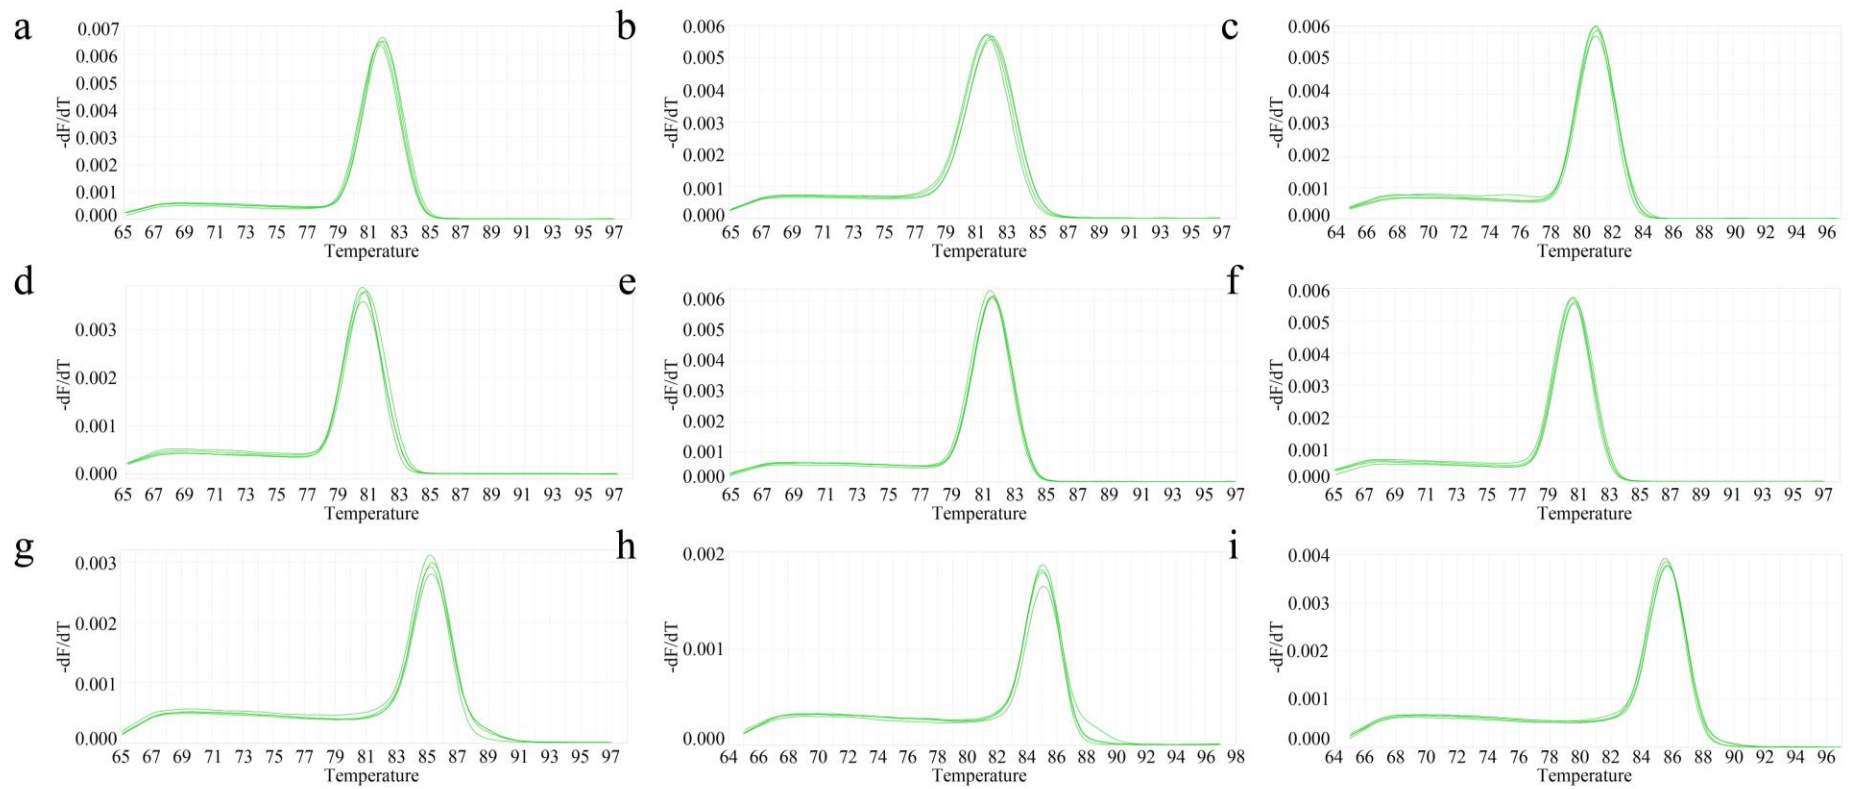

**Supplementary Figure S1. The melting peaks of candidate reference genes.** Plots a-i represent the melting peaks of 5.8S rRNA, U6 snRNA, ACT, UBQ, GAPDH, EF1, miR160e, miR164a, and miR168, respectively.

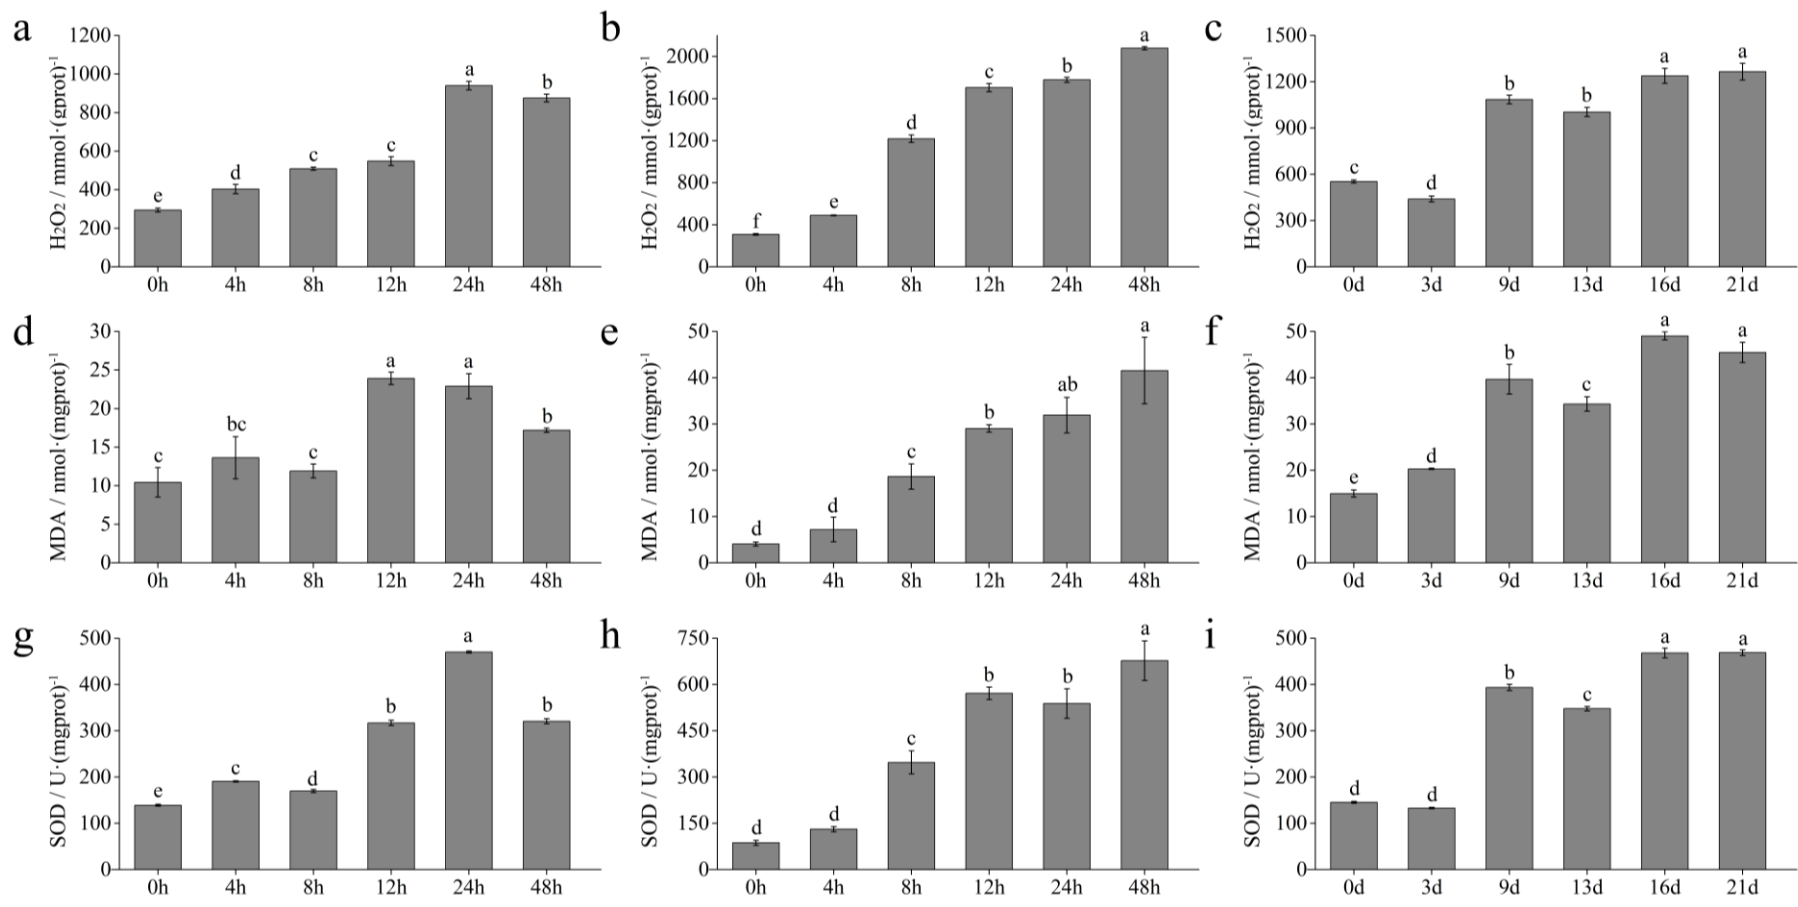

**Supplementary Figure S2. The physiological response of grapevine leaves for different stresses.** Plots a-c represent the  $\text{H}_2\text{O}_2$  content at six sampling time points under salinity, cold and drought stress, respectively; Plots d-f represent the MDA content at six sampling time points under salinity, cold and drought stress, respectively; Plots g-i represent the SOD activity at six sampling time points under salinity, cold and drought stress, respectively.
